1

2 **CX3CL1 and CX3CR1 Expressing Tendon Cells – A novel Immune Cell Population in the Tendon Core**

3

4 **Running titel: CX3CL1/CX3CR1-axis in tendon cells**

5

6 Christine Lehner<sup>1,3</sup>, Gabriel Spitzer<sup>1,3</sup>, Renate Gehwolf<sup>1,3</sup>, Andrea Wagner<sup>1,3</sup>, Nadja  
7 Weissenbacher<sup>1,3</sup>, Christian Deininger<sup>1,2</sup>, Katja Emmanuel<sup>2</sup>, Florian Wichlas<sup>2</sup>, Herbert  
8 Tempfer<sup>1,3</sup>, Andreas Traweger<sup>1,3</sup>

9 <sup>1</sup> Institute of Tendon and Bone Regeneration, Spinal Cord Injury & Tissue Regeneration  
10 Center Salzburg, Paracelsus Medical University, Salzburg, Austria.

11 <sup>2</sup> Department of Orthopedics and Traumatology, Paracelsus Medical University, Salzburg,  
12 Austria.

13 <sup>3</sup> Austrian Cluster for Tissue Regeneration, Vienna, Austria.

14

15 **Corresponding author:**

16 Herbert.Tempfer@pmu.ac.at

17

18 **Keywords:** Fractalkine (FKN), CX3CL1/CX3CR1, epieregulin, myeloid cells, inflammation,  
19 tendinopathy, tendon homeostasis

20

21 **Summary Statement:**

22 Here, we demonstrate the presence of a macrophage-like, CX3CL1/CX3CR1-expressing cell  
23 population within the healthy tendon proper potentially fulfilling a surveillance function.

24

25 **Abstract:**

26 Tendon disorders frequently occur and recent evidence has clearly implicated the presence  
27 of immune cells and inflammatory events during early tendinopathy. However, the origin  
28 and properties of these cells remain poorly defined. Therefore, the aim of this study was to  
29 determine the presence of myeloid cells in healthy rodent and human tendon tissue and to  
30 characterize them. Using various transgenic reporter mouse models, we demonstrate the  
31 presence of tendon cells in the dense matrix of the tendon core expressing the fractalkine  
32 (Fkn) receptor CX3CR1 and its cognate ligand CX3CL1/Fkn. Pro-inflammatory stimulation of  
33 3D tendon-like constructs *in vitro* resulted in a significant increase in the expression of IL-1 $\beta$ ,  
34 IL-6, Mmp3, Mmp9, Cx3cl1, and epiregulin which has been reported to contribute to  
35 inflammation, wound healing, and tissue repair. Furthermore, we demonstrate that  
36 inhibition of the fractalkine receptor blocked tendon cell migration *in vitro* and show the  
37 presence of CX3CR1/CX3CL1/EREG expressing cells in healthy human tendons. Taken  
38 together, we demonstrate the presence of CX3CL1+/CX3CR1+ “tenophages” within the  
39 healthy tendon proper potentially fulfilling surveillance functions in tendons.

40

## 41 INTRODUCTION

42 Tendon pathologies and injuries are one of the most common musculoskeletal disorders,  
43 however due to the tissue's poor regenerative capacity the healing process is long-lasting  
44 and outcomes are often not satisfactory. Consequently, tendinopathies represent a  
45 substantial social and economic burden (Schneider et al., 2018). The limited availability of  
46 effective treatment options not only owes to the multifactorial nature of tendinopathies, but  
47 above all results from our insufficient understanding of the cellular and molecular  
48 mechanisms leading to the onset and progression of the disease. Therefore, gaining a  
49 deeper insight into the nature and function of tendon-resident cells in tissue homeostasis  
50 and disease is imperative for developing new treatment strategies for tendinopathies.

51 Due to the composition and structure of the extracellular matrix (ECM), tendons are  
52 able to withstand enormous tensile forces, so that spontaneous ruptures rarely occur  
53 without preceding features of tissue degeneration. Besides repetitive overload, smoking,  
54 and the intake of certain drugs, also obesity and various metabolic diseases are recognized  
55 risk factors for the development of tendinopathies. Interestingly, a role of inflammation in  
56 the pathogenesis of tendinopathy has long been debated, the underlying mechanisms being  
57 poorly understood. The presence of myeloid and lymphoid cells such as mast cells, T cells,  
58 and macrophages during early human tendinopathy however highlight a role of  
59 inflammation in tendon disease (Dean et al., 2016; Kraggsnaes et al., 2014; Millar et al., 2010).  
60 However, the origin of these immune cells is unclear; whether they invade the tissue from  
61 the circulation and neighbouring tissue, or whether tissue-resident myeloid cells are present  
62 and are activated upon damage, or a combination of both mechanisms. Generally, tissue-  
63 resident macrophages *in vivo* are not a homogeneous cell population, but heterogeneous in  
64 nature and respond to certain stimuli with overlapping functions and phenotypes and  
65 therefore often can not be classified into simple, polarized categories (Davies and Taylor,  
66 2015). As the majority of these cells are usually situated in the vicinity of blood vessels  
67 (Hume et al., 1984), it seems plausible that this would also apply for tissue-resident myeloid  
68 cells in tendons. However, the presence and distribution of immune cells in healthy tendons  
69 has not been thoroughly investigated so far and due to the hypovascular nature of tendons,  
70 we hypothesize that in tendons resident myeloid cells not only are present in the  
71 perivascular region, but also reside within the dense, collagen-rich tendon core fulfilling a  
72 surveillance function similar to Langerhans cells in the skin or microglia in the brain (Deckers  
73 et al., 2018; Lehner et al., 2016).

74 In general, the main effectors of inflammation are myeloid cells, most notably  
75 monocytes and macrophages. Among the known factors that control e.g. monocyte  
76 recruitment is the chemokine CX3CL1, or Fractalkine (FKN), and its cognate receptor CX3CR1  
77 (Lee et al., 2018). CX3CR1 is expressed by myeloid and lymphoid lineage cells, including mast  
78 cells and natural killer cells (Mass et al., 2016; Sasmono and Williams, 2012). In addition,  
79 CX3CL1/FKN has been demonstrated to regulate the communication between neurons, glia  
80 and microglia, and CX3CR1-expressing microglia have been suggested to be pivotal in  
81 limiting tissue injury during inflammation and neuro-degeneration (Sheridan and Murphy,

82 2013). Overall, depending on the tissue type CX3CR1-expressing cells can either contribute  
83 to maintenance of tissue homeostasis or play a role in disease progression. These findings  
84 prompted us to investigate if the CX3CL1/CX3CR1 axis might also be relevant in tendons.  
85 Therefore, the purpose of this study was (1) to assess the presence of tendon core-resident  
86 cells in healthy rodent and human tissues expressing immune cell-related markers and (2) to  
87 explore the ramifications of pro-inflammatory stimulation on the CX3CL1/CX3CR1 system in  
88 3D tendon-like constructs *in vitro*.

89

## 90 RESULTS

### 91 *Tendon-resident cells express immune cell-related markers*

92 To evaluate the presence of tendon-resident cells expressing immune-cell markers  
93 we probed Achilles tendon tissue sections from the transgenic *Scx-GFP* tendon reporter  
94 mouse strain (Pryce et al., 2007). As shown in figure **1A** and **B**, GFP-positive cells located in  
95 the dense tendon core co-expressed the widely used pan-macrophage marker CD68, F4/80,  
96 a unique marker of murine macrophages, and also the macrophage-specific hemoglobin (Hb)  
97 scavenger receptor CD163. Further, immunohistochemical staining also revealed tendon  
98 cells co-expressing MHC class II, a membrane-bound marker for antigen-presenting cells such  
99 as macrophages, B-lymphocytes and dendritic cells (Kristiansen et al., 2001). To further  
100 substantiate the presence of myeloid cells in the tendon proper we also investigated Achilles  
101 tendon tissue of the transgenic MacGreen reporter mouse strain. These mice express EGFP  
102 under the control of the mouse colony stimulating factor 1 receptor (*Csf-1r*) promoter,  
103 labelling mononuclear phagocyte lineage cells (Sasmono et al., 2003). As shown in figure **1C**  
104 several cells in the tendon proper were positive for EGFP, indicating the presence of myeloid  
105 cells. Further, the majority of the EGFP-positive cells also stained positive for Cx3cr1 (Fkn  
106 receptor) and expression of the receptor was also confirmed using a transgenic mouse strain  
107 expressing EGFP driven by the *Cx3cr1* promoter (Jung et al., 2000) (**Suppl. fig. 1**). Finally, by  
108 employing double immunolabelling we further demonstrate that the fractalkine receptor  
109 and its ligand Cx3cl1 are both co-expressed by tendon cells (**Fig. 2A**) and the expression of  
110 Cx3cr1 specifically in tendon cells was also confirmed by probing Achilles tendon sections of  
111 the *Scx-GFP* tendon reporter mouse strain (**Fig. 2B**).

112 FKN has been described to induce shedding of epiregulin (EREG), a 46-amino acid  
113 protein belonging to the Epidermal Growth Factor (EGF) family of peptide hormones, and  
114 further to rapidly increase epiregulin mRNA expression 20-fold (White et al., 2010).  
115 Therefore, we investigated tendon tissue sections for the presence of EREG. Indeed,  
116 epiregulin is also expressed in tendon-resident cells expressing *Scx-GFP* or *Cx3cr1-EGFP* (**Fig.**  
117 **2C, D**). Finally, Cx3cr1-positive cells also express both macrophage markers CD68 and CD163  
118 (**Suppl. fig. 2**).

119 Next, to determine whether these cells, apart from their macrophage-associated  
120 marker profile, also possess phagocytic activity we exposed unfixed rat flexor tendons to  
121 pHrodo™ Green *S. aureus* Bioparticles™ which upon cellular uptake emit fluorescence due

122 to a shift in pH. As shown in **figure 3**, we detected several positive cells within the tendon  
123 core embedded in the dense collagenous matrix, demonstrating the presence of phagocytic  
124 cells within the tendon proper *in vivo*.

125

126

127 *Pro-inflammatory stimulation of 3D tendon-like constructs increases fractalkine and*  
128 *epiregulin expression.*

129 Having identified tendon-resident cells expressing immune cell-related markers, we  
130 next examined the response of primary tendon stem and progenitor cells (subsequently  
131 referred to as TDSPCs) to pro-inflammatory stimuli. We therefore generated 3D type I  
132 collagen-embedded tendon cell cultures as previously described (Gehwolf et al., 2019) and  
133 analyzed the expression of both tendon-specific and matrix-associated as well as  
134 inflammation-related markers after exposure to IL-1 $\beta$ , TNF- $\alpha$  or a combination of both (**Fig.**  
135 **4A**). As shown in **figure 4B**, stimulation of the constructs significantly increased the gene  
136 expression of *IL-1 $\beta$* , *TNF- $\alpha$* , and *IL-6*, as well as several extracellular-matrix (ECM)-associated  
137 proteins such as lysyloxidase (*Lox*) and the matrix metalloproteinases (MMPs) *Mmp1*,  
138 *Mmp3*, and *Mmp9*. A synergistic effect of IL-1 $\beta$  and TNF $\alpha$  stimulation was seen for several  
139 candidate genes, however IL-1 $\beta$ -treatment generally had a more pronounced effect on gene  
140 expression. No significant effect was evident for the expression of type I collagen (*Col1a1*)  
141 and type 3 collagen (*Col3a1*). Further, there was little or no impact on the expression of the  
142 tenogenic marker proteins Tenomodulin (*Tnmd*), Mohawk (*Mkx*) and Scleraxis (*Scx*).

143 IL-1 $\beta$  exposure led to a moderate 2-fold increase in the expression of the  
144 macrophage-related marker CD68, whereas a significant increase ( $\geq 20$ -fold) in *Fkn* (*Cx3cl1*)  
145 and *Ereg* mRNA quantities was observed, which was even higher if co-stimulated with TNF $\alpha$ .  
146 These results were further underscored by immunofluorescent analysis, demonstrating that  
147 pro-inflammatory treatment mainly affected the expression of Cx3cl1 and Ereg (**Fig. 5B**).  
148 Finally, to obtain quantitative data on protein levels we also performed Western blot  
149 analysis on lysates prepared from stimulated and unstimulated 3D tendon-like constructs.  
150 Again, a significant increase in expression was observed for both Cx3cl1 and Ereg (**Fig. 5C**).

151

152 *Inhibition of CX3CR1 signalling blocks tendon cell migration*

153 In order to address a putative function of the CX3CL1/CXCR1 signalling axis in tendon-  
154 resident cells, we next performed cell migration assays. To inhibit CX3CR1 we applied AZD  
155 8797 (Axon Medchem, Groningen, Netherlands), a selective, high-affinity small-molecule  
156 inhibitor of CX3CR1. Importantly, early passage rat TDSPCs (p1) retain the expression of both  
157 FKN and its receptor (**Fig. 6A**). Interestingly, treatment with the FKN receptor antagonist led  
158 to a reduction of IL-1 $\beta$ -triggered mRNA expression of *IL-1 $\beta$*  and *IL-6* back to control levels  
159 (**Fig. 6B/C**). Analysis of the wound scratch assay revealed that AZD 8797 almost completely  
160 blocked migration of TDSPCs on uncoated and type I collagen-coated cell culture dishes (**Fig.**  
161 **6D/E**).

162

163

164 *CX3CL1, CX3CR1, and epiregulin are expressed in healthy human tendon tissue.*

165 Finally, we were interested to see whether fractalkine, its receptor CX3CR1 and  
166 epiregulin are also expressed in healthy human tendons. To this end, we probed cryo-  
167 sections of human semitendinosus tendons obtained from a healthy, 34 year old male (**Fig.**  
168 **7A**). Indeed, next to a strong expression at blood vessel walls (**Suppl. fig. 3**), our analysis  
169 revealed the presence of distinct cells within the tendon proper expressing CX3CL1,  
170 CX3CL1, and EREG (**Fig. 7B-D**). To conclude, our results clearly demonstrate the presence of a  
171 CX3CL1/CX3CR1/EREG expressing cell population in healthy murine and human tendon  
172 tissue.

173

## 174 **DISCUSSION**

175 Our understanding of the cellular and molecular mechanisms underlying  
176 tendinopathies remains very fragmentary. The term tendinopathy encompasses a broad  
177 spectrum of tendon-related diseases and is mainly characterized by activity-related pain.  
178 Historically, there has been substantial debate about the terminology and if inflammation is  
179 of importance in the development and progression of tendinopathies (Khan et al., 2002;  
180 Khan et al., 2000). In contrast, more recent studies elegantly highlight the involvement of  
181 immune cells and activation of inflammatory processes in tendinopathy (Dean et al., 2017).  
182 However, the origin of these cells remains unknown and it is unclear if they mainly  
183 extravasate into the tissue upon injury or metabolic stress or if tendon-resident  
184 macrophages or mast cells exist in healthy tendon tissue initiating the first line response.  
185 Therefore, we aimed to formally demonstrate the presence of myeloid cells in intact, healthy  
186 murine and human tendons and to characterize a population of “tenophages” in the tendon  
187 core.

188 In the present study, we demonstrate the presence of cells positive for myeloid cell-related  
189 markers located within the dense tendon core region (**Fig.1**). Interestingly, these cells were  
190 also positive for the widely accepted tendon-specific marker Scleraxis, a member of the basic  
191 helix-loop-helix (bHLH) superfamily of transcription factors. Hence, it is indeed tendon cells  
192 themselves expressing myeloid surface marker proteins. To our knowledge, this is the first  
193 description of such a cell population in healthy tendons. Apart from their cell surface marker  
194 profile these cells also appear to exert phagocytic activity as evidenced by an *ex vivo*  
195 phagocytosis assay (**Fig.3**). In addition, by making use of a transgenic mouse model we  
196 demonstrate the presence of a population of cells within the tendon proper, expressing Fkn  
197 (Cx3cl1) and its cognate receptor Cx3cr1 (**Fig.2**). CX3CR1 expression is associated with  
198 increased migration and site specific dissemination having been shown to be expressed by  
199 endothelial cells, mast cells, monocytes, tissue-resident macrophages, natural killer (NK)  
200 cells, microglial cells, neurons and subpopulations of T-lymphocytes (Imai et al., 1997;  
201 Papadopoulos et al., 2000; You et al., 2007). The seven-transmembrane domain G protein-  
202 coupled fractalkine receptor CX3CR1 mediates several intracellular signalling pathways, such

203 as the p38MAPK signalling and the Akt pathway (Li et al., 2016; Wu et al., 2016). It has two  
204 known functional ligands, the chemokine CX3CL1 (also called neurotactin or fractalkine/FKN)  
205 and CCL26 (eotaxin-3), the latter being 10-fold less potent than CX3CL1 (Nakayama et al.,  
206 2010). FKN is structurally unique amongst the family of chemokines and is expressed both in  
207 the central nervous system and peripheral nerves, as well as in endothelial cells, dendritic  
208 cells and lymphocytes (Bazan et al., 1997; Kanazawa et al., 1999; You et al., 2007). It is  
209 constitutively cleaved by the ADAM-metalloprotease ADAM10 and upon cell stress, such as  
210 tissue injury, shedding is further promoted by ADAM17 (also known as the TNF- $\alpha$  converting  
211 enzyme, TACE), releasing an extracellular soluble fragment. In addition, the cysteine  
212 protease Cathepsin S has been shown to selectively cleave FKN (Fonovic et al., 2013). In its  
213 soluble form FKN mediates chemotaxis of immune cells, whilst membrane bound FKN acts as  
214 an adhesion molecule mediating leukocyte capture and infiltration (Clark et al., 2011; Imai et  
215 al., 1997; Umehara et al., 2004). FKN has been reported to be released by apoptotic  
216 lymphocytes stimulating macrophage chemotaxis and recruiting professional phagocytes to  
217 the site of cell death (Truman et al., 2008). Beyond simple recruitment, FKN has also been  
218 shown to enhance the ability of macrophages and microglia to execute their phagocytic  
219 functions (Tsai et al., 2014). Since accumulation of microruptures preceding tendon tears  
220 goes along with cell death and subsequent clearance of the cellular debris is required, it is  
221 tempting to speculate that the presence of FKN in the tendon might serve as „find-me“  
222 signal for macrophages invading the tissue from the circulation (Lundgreen et al., 2011;  
223 Sokolowski et al., 2014).

224 Geissmann et al. describe two different circulating monocyte populations,  
225 CCR2<sup>-</sup>CX<sub>3</sub>CR1<sup>high</sup> monocytes (MCs) that home constitutively to tissues and short-lived  
226 CCR2<sup>+</sup>CX<sub>3</sub>CR1<sup>low</sup> monocytes that only home to inflamed tissues (Geissmann et al., 2003). The  
227 authors suggest that cells derived from resident CCR2<sup>-</sup>CX<sub>3</sub>CR1<sup>high</sup> monocytes, such as  
228 osteoclasts, Kupffer cells, and microglia, are involved in tissue homeostasis (Geissmann et  
229 al., 2003). Along these lines, CCR2<sup>-</sup>CX<sub>3</sub>CR1<sup>high</sup> (also termed “nonclassical”) monocytes exhibit  
230 a unique ability to patrol the resting vasculature and remove debris (Auffray et al., 2007;  
231 Carlin et al., 2013). CX<sub>3</sub>CR1 positive cells in the tendon core might therefore represent such  
232 a population of myeloid precursor cells and indicate a role of CX<sub>3</sub>CR1 in tendon tissue  
233 homeostasis. It is also noteworthy, that non-classical MCs generally possess inflammatory  
234 characteristics and secrete inflammatory cytokines upon stimulation (Yang et al., 2014),  
235 similar to what we have observed for tendon cell-derived 3D constructs *in vitro* (**Fig. 4B**).

236 CCR2<sup>-</sup>CX<sub>3</sub>CR1<sup>high</sup> monocytes have been described within the parenchyma of multiple  
237 tissues, including the brain. Sheridan and Murphy highlight the crosstalk of neurons and glia  
238 in health and disease and discuss that the FKN/CX<sub>3</sub>CR1 ligand/receptor pair seems to have  
239 evolved as a communication link between neurons and microglial cells, being crucial not only  
240 for maintaining tissue homeostasis under normal physiological conditions, but also being  
241 activated under inflammatory conditions such as stroke or Alzheimer’s disease (Sheridan and  
242 Murphy, 2013). We speculate that the observed presence of the CX<sub>3</sub>CL1/CX<sub>3</sub>CR1 system  
243 within the tendon might serve similar surveilling functions as in the brain and that upon

244 inflammatory stimulation the system reacts by upregulating FKN thereby attracting  
245 additional monocytes from the circulation.

246 Fractalkine has also been shown to induce aortic smooth muscle cell proliferation  
247 through an autocrine pathway by initiating phosphorylation of the mitogen-activated protein  
248 (MAP) kinases p38, c-Jun N-terminal kinase (JNK) and extracellular-regulated kinase (ERK)  
249 1/2, as well as the serine-threonine kinase Akt in osteoarthritis fibroblasts (Klosowska et al.,  
250 2009; White et al., 2010). Interestingly, the observed effects of FKN on proliferation of  
251 coronary artery smooth muscle cells (CASMCs) are accompanied by transcription and release  
252 of epiregulin. In their study, White et al. describe that FKN induces shedding of epiregulin  
253 and increases epiregulin mRNA expression 20-fold within 2 hours (White et al., 2010). Here  
254 we report the presence of Scx-positive tendon cells also expressing Cx3cr1 and Ereg.  
255 Epiregulin is a 46-amino acid protein belonging to the Epidermal Growth Factor (EGF) family  
256 of peptide hormones. It binds to EGF receptors (EGFR) ErbB1 (HER1) and ErbB4 (HER4) and  
257 can stimulate signaling of ErbB2 (HER2/Neu) and ErbB3 (HER3) through ligand-induced  
258 heterodimerization with a cognate receptor. EREG is initially expressed as an extracellular  
259 transmembrane protein, which is cleaved by disintegrins and metalloproteinase enzymes  
260 (ADAMs) releasing a soluble form. Epiregulin has been shown to contribute to inflammation,  
261 wound healing, tissue repair, and oocyte maturation by regulating angiogenesis and vascular  
262 remodeling and by stimulating cell proliferation (Harada et al., 2015; Martin et al., 2017;  
263 Murakami et al., 2013; Riese and Cullum, 2014). In renal proximal tubular cells (RPTC),  
264 addition of 10ng/ml epiregulin enhanced both RPTC proliferation and migration via  
265 activation of the EGF receptor (EGFR), Akt, a downstream kinase of phosphoinositide 3-  
266 kinase (PI3K), and extracellular signaling-regulated kinase 1/2 (ERK1/2)(Zhuang et al., 2007).  
267 Similarly, for adipose derived mesenchymal stem cells epiregulin has been described to  
268 promote migration and chemotaxis ability via mitogen-activated protein kinase signalling  
269 pathways (Cao et al., 2018). Further, in Caco-2 epithelial cells EREG mRNA and protein levels  
270 have been shown to be increased by incubation with exogenous IL-1 $\beta$  (Massip-Copiz et al.,  
271 2018). This finding is well in line with our own data revealing that stimulation of 3D tendon-  
272 like constructs with IL-1 $\beta$ , or a combination of IL-1 $\beta$  and TNF- $\alpha$  significantly increased the  
273 expression of Ereg both on the gene as well as on the protein level.

274 Next to enhancing cell proliferation, FKN also promotes migration. Klosowska et al.  
275 demonstrate that FKN effectively induces migration of osteoarthritis (OA) fibroblasts  
276 (Klosowska et al., 2009). Similar findings have been reported by You et al. who showed that  
277 FKN is an angiogenic mediator *in vitro* and *in vivo*. FKN significantly induced migration of  
278 human umbilical vein endothelial cells (HUVECs) as well as bovine retinal capillary  
279 endothelial cells (BRECs) and promoted formation of endothelial cell capillary tubes on  
280 synthetic matrix. Moreover, FKN promoted blood vessel growth in a rabbit corneal pocket  
281 neovascularization assay (You et al., 2007). These observations of the pro-migratory effect of  
282 FKN corroborate our own data showing that addition of the CX3CR1 specific inhibitor AZD  
283 8797 results in significantly reduced migration of rat tendon-derived cells *in vitro* (**Fig. 6**).



284 Interestingly, nuclear factor kappaB (NF- $\kappa$ B) signaling has recently been demonstrated  
285 to be increased in clinical tendinopathy (Abraham et al., 2019) and it is known that FKN is  
286 stimulated by NF- $\kappa$ B -mediated inflammatory processes. Garcia et al. showed that NF- $\kappa$ B-  
287 dependent FKN induction in rat aortic endothelial cells is stimulated by IL-1 $\beta$ , TNF- $\alpha$  and  
288 lipopolysaccharide (LPS) (Garcia et al., 2000). Moreover, in human lung fibroblasts a  
289 dramatic increase in both soluble CX3CL1 protein and mRNA transcripts in a dose- and time-  
290 dependent manner has been reported to be synergistically induced by a combination of IL-  
291 1 $\beta$  and IFN- $\gamma$  (Isozaki et al., 2011). Again, we observed similar responses in 3D tendon-cell  
292 cultures upon stimulation with IL-1 $\beta$ , TNF- $\alpha$ , or a combination of both (**Fig. 5**).

293 In summary, we describe the presence of macrophage-like tendon cells and provide  
294 evidence for the expression of the CX3CL1/CX3CR1 axis and the peptide hormone epiregulin  
295 in healthy rodent as well as human tendons. Interestingly, not only did we observe  
296 perivascular expression of these proteins, but also very distinctly in cells within the dense,  
297 collagen-rich matrix of tendons. We therefore propose that this newly identified cell  
298 population fulfils a surveillance function and is activated upon tendon tissue injury or  
299 pathological stress. Given the role in cell proliferation and angiogenesis upon inflammation  
300 and considering that both are hallmarks of tendinopathy, targeting the  
301 CX3CR1/CX3CL1/EGFR axis could potentially open up new vistas in tendinopathy therapy.

302

## 303 **Materials and Methods**

### 304 *Cell culture*

305 Primary TDSPCs were isolated from Achilles tendons of 5 rats (Fisher, female, 12 weeks). To  
306 this end, rat Achilles tendons were dissected, finely minced and digested in Dulbecco's  
307 modified Eagle's medium (DMEM) containing 2 mg/ml type II collagenase (Sigma-Aldrich, St.  
308 Louis, MO, USA) for 12 hours at 37 °C and 5% CO<sub>2</sub>. The isolated cells were placed in DMEM  
309 containing 10% fetal bovine serum (FBS), 100 units/ml penicillin, 100  $\mu$ g/ml streptomycin, at  
310 37 °C with 5% CO<sub>2</sub>. Only passages 1-3 of the obtained TDSPCs were used in this study.  
311 Results of at least three independent experiments are presented.

### 312 *Tendon-like constructs*

313 In order to better mimick the tendon's natural environment, we performed most of our  
314 experiments using 3D-collagen embedded tendon cell cultures. These artificial tendon-like  
315 constructs were established as described by our group (Gehwolf et al., 2019). In brief, 2.5 x  
316 10<sup>5</sup> rat Achilles tendon-derived cells (passage 2) were mixed with collagen type I (PureCol™  
317 EZ Gel solution, # 5074, Sigma-Aldrich, Vienna, Austria; endconcentration 2mg/ml) and  
318 spread between two silk sutures pinned with insect pins in rows on SYLGARD 184 (Sigma-  
319 Aldrich) coated petri dishes. To improve formation of the constructs, Aprotinin, Ascorbic  
320 acid, and L-Proline were added to the cell culture medium. After contraction of constructs  
321 over the course of 11 days, 10ng/ml IL-1 $\beta$  (PeproTech, Vienna, Austria), 10ng/ml TNF  $\alpha$

322 (Invitrogen, Carlsbad, USA) and a combination of both cytokines, respectively, was added to  
323 the culture medium. After incubation for 24 hours constructs were harvested and stored  
324 either in TRIReagent (Sigma-Aldrich, Austria) for further qPCR analysis, fixed in 4%  
325 paraformaldehyde for immunohistochemical analysis or frozen at -80°C for subsequent  
326 western blot analysis.

### 327 *Animals*

328 C57BL/6 mice (males, 10-12 weeks old, 20-25g) were purchased from the Charles River  
329 Laboratories. All animals were acclimatized to standard laboratory conditions (14-h light, 10-  
330 h dark cycle) and given free access to rodent chow and water.

331 Colony-stimulating factor 1 receptor (*Csf-1r*)-*GFP* and C-X3-C motif chemokine receptor 1  
332 (*Cx3cr1*)-*GFP* transgenic mice were kindly provided by Dr. Stella Autenrieth from the Medical  
333 Clinic of the University of Tübingen and by Prof. Thomas Langmann from the Eye Clinic of the  
334 University of Cologne.

335 Female, 12 week old Fisher rats were purchased from Janvier Labs (France, Europe).

### 336 *Human tendon tissue*

337 Human Semitendinosus tendons available in the course of cruciate ligament reconstructions  
338 were provided by the local university clinic after an Ethics approval (E-Nr. 2374) by the local  
339 government and prior patients' informed consent.

### 340 *Preparation of tissue sections*

341 Mouse Achilles, human semitendinosus tendons and rat tendon-like constructs were fixed in  
342 4% paraformaldehyde for 12 hours at 4 °C, and after several washes in phosphate-buffered  
343 saline (PBS) and cryo-preservation in 30% sucrose in PBS embedded in cryomedium  
344 (Surgipath Cryogel®, Leica Microsystems, Vienna, Austria). Subsequently, 12 µm cryosections  
345 were prepared using a Leica CM1950 cryostat.

### 346 *Histology and Immunohistochemistry*

347 For descriptive histology cryosections were stained either using Hematoxylin & Eosin or  
348 Alcian Blue stain according to standard protocols. In brief, after staining the sections with  
349 Weigert hematoxylin for two minutes, the staining was stopped with 1 % acetic acid  
350 including a short differentiation step by shortly dipping the slides into HCl/ethanol. After  
351 blueing the sections under running tap water for 10 minutes, sections were stained with 1 %  
352 eosin Y solution for 1 minute and again immersed in 1 % acetic acid to stop the staining  
353 reaction. Subsequently, the sections were dehydrated in an increasing ethanol series (70%,  
354 96%, 2x 100%) and incubated twice in Rotihistol. Finally, sections were coverslipped with  
355 mounting medium.

356 For Alcian Blue staining, sections were incubated in Alcian Blue solution (pH 2.5) for 15 min,  
357 rinsed in tap water and counterstained with neutral red stain for 1 min. Finally, sections  
358 were rapidly dehydrated in absolute alcohol, cleared in Roti-Histol (Carl Roth, Karlsruhe,  
359 Germany) and mounted in Roti-Histokitt (Carl Roth, Karlsruhe, Germany).

360 Immunohistochemical detection of immune cell-related markers was performed on  
361 cryosections of tendons and tendon-like constructs, respectively. After a 5 min rinse in tris-  
362 buffered saline (TBS; Roth, Karlsruhe, Germany) slides were incubated for 1h at room  
363 temperature (RT) in TBS containing 10% donkey serum (Sigma-Aldrich, Vienna, Austria), 1%  
364 bovine serum albumin (BSA; Sigma-Aldrich, Vienna, Austria), and 0.5% Triton X-100 (Merck,  
365 Darmstadt, Germany). Followed by a 5 min rinse, slides were subsequently incubated for  
366 double or triple immunohistochemistry (overnight at 4°C) with antibodies directed against  
367 FKN/CX3CL1 C-X3-C motif chemokine ligand 1 (CX3CL1, #ab25088, Abcam, Cambridge, UK; 1:  
368 100), CX3C chemokine receptor 1 (CX3CR1, #orb10490, Biorybt, Cambridge, UK; 1:100),  
369 Cluster of Differentiation 68 (CD68, #sc20060, Santa Cruz, Dallas, USA; 1:50), Cluster of  
370 Differentiation 163 (CD163, #ab182422, Abcam, Cambridge, UK; 1:100), epiregulin  
371 (EREG/aa1-162, #LS-C314859, LSBio, Seattle, USA; 1:100; #ab195620, Abcam, Cambridge,  
372 UK; 1:100), EGF-like module-containing mucin-like hormone receptor-like 1 (F4/80,  
373 MCA497RT, Serotec, Oxford, UK; 1:100) and major histocompatibility complex II (MHCII,  
374 #ab157210, Abcam, Cambridge, UK; 1:100), all diluted in TBS, BSA, and Triton X-100. After a  
375 rinse in TBS (four times 5 min) binding sites of primary antibodies were visualized by  
376 corresponding Alexa488-, Alexa568-, or Alexa647-tagged antisera (1:500; Invitrogen,  
377 Karlsruhe, Germany) in TBS, containing 1% BSA and 0.5% Triton X-100 (1h at RT) followed by  
378 another rinse in TBS (four times 5 min). Some of the slides received an additional nuclear  
379 staining using 4',6-Diamidino-2-phenylindol dihydrochlorid (DAPI). For that, slides were  
380 incubated 10 min (1:4000, stock 1 mg/ml, VWR, Vienna, Austria) followed by a rinse in PBS  
381 (three times 5 min). All slides were embedded in Fluoromount™ Aqueous Mounting  
382 Medium (Sigma Aldrich, Vienna, Austria). Negative controls were performed by omission of  
383 the primary antibodies during incubation and resulted in absence of immunoreactivity.

#### 384 *In situ phagocytosis assay*

385 Rat flexor tendons (n=3) were freshly isolated and halved lengthwise by a scalpel. The  
386 tendons were placed in a 12 well cell culture dish with the cut surface pointing upwards in  
387 Minimum essential medium supplemented with 10 % fetal bovine serum, exposing the  
388 tendon proper. pHrodo™ Green S. aureus Bioparticles™ conjugate for Phagocytosis  
389 (#P35367, Thermo Fisher Scientific, Massachusetts, USA) were added to the tendons at a  
390 final concentration of 100 µg/ml. These particles are non-fluorescent outside the cell at  
391 neutral pH, but fluorescent (488nm) at acidic pH such as in phagosomes, thus allowing to  
392 identify cells with phagocytic activity.

393 After 24 h, the tendons were counterstained with DAPI for 5 minutes and analyzed by  
394 confocal microscopy.

## 395 *Confocal imaging*

396 Confocal imaging was performed using a LSM1 700 confocal microscope (Zeiss) equipped  
397 with 405 nm (5 mW fiber output), 488 nm (10 mW fiber output), 555 nm (10 mW fiber  
398 output) and 639 nm (5 mW fiber output) diode lasers, a main dichroic beam splitter URGB  
399 and a gradient secondary beam splitter for LSM 700 using a 10x EC Plan-Neofluar (10x/0.3) or  
400 a 20x Plan-Apochromat (20x/0.8) objective (Zeiss, Munich, Germany). Image acquisition was  
401 done with ZEN 2010 (Zeiss), and image dimensions were 1024×1024 pixels with an image  
402 depth of 16 bit. Two times averaging was applied during image acquisition. Laser power and  
403 gain were adjusted to avoid saturation of single pixels. All images were taken using identical  
404 microscope settings based on the secondary antibody control stainings.

## 405 *Quantitative RT-PCR*

406 Total RNA was isolated from tendon-like constructs (n=5 animals, 2 constructs each) using  
407 TRI<sup>®</sup> Reagent (Sigma-Aldrich; Vienna, Austria) according to the manufacturer's protocol. RNA  
408 yield was quantified using a Nanodrop 2000C (ThermoFisher Scientific, Vienna, Austria) and  
409 RNA integrity was verified using an Experion Automated Electrophoresis system (Biorad,  
410 Munich, Germany). A minimum requirement of the RNA quality indicator (RQI) >7.5 was  
411 chosen.

412 qRT-PCR was performed as described by Lehner et al. using TaqMan<sup>®</sup> assays from IDT  
413 (Integrated DNA Technologies, Coralville, IA, USA) targeting all genes listed in Table 1  
414 (Lehner et al., 2016). Amplification conditions were 50 °C for 2 min, 95 °C for 10 min,  
415 followed by 40 cycles of 95 °C for 15 s and 60 °C for 1 min. All samples were run in duplicate.  
416 CQ values were analyzed using qBasePlus v. 2.4 (Biogazelle NV, Zwijnaarde, Belgium) and  
417 normalized relative quantities were calculated by normalizing the data to the expression of  
418 previously validated endogenous control genes as described by Vandesompele et al.  
419 (Vandesompele et al., 2002). As housekeeping genes eukaryotic translation initiation factor  
420 2B subunit alpha (*Eif2b1*), polymerase (RNA) II (DNA Directed) polypeptide A (*Polr2a*), and  
421 tyrosine 3-monooxygenase/tryptophan 5-monooxygenase activation protein zeta (*Ywhaz*)  
422 were used. The normalized quantities were then determined for the candidate genes scaled  
423 against the expression values determined for the controls to generate fold changes in  
424 expression.

425 **Table 1**

| Target Gene   | ID                | Primer 1 sequence             | Primer 2 sequence           |
|---------------|-------------------|-------------------------------|-----------------------------|
| <i>Aif1</i>   | Rn.PT.58.24212786 | TCGATATCTCCATTGCCATTCAG       | GATGGGATCAACAAGCACTTC       |
| <i>CD68</i>   | Rn.PT.58.37733352 | TGAGAATGTCCACTGTGCTG          | CATCCCTTACGGACAGCTTAC       |
| <i>Col1A1</i> | Rn.PT.58.8986002  | GAGAACCAGCAGAGCCA             | GAACAAGGTGACAGAGGCATA       |
| <i>Col3A1</i> | Rn.PT.58.35133758 | CCTGGATTACCATTGTTGCC          | CCCTGGTGGTTCTGGAC           |
| <i>Cx3cl1</i> | Rn.PT.58.7331682  | GATAGTGGATGAGCAAGGTCA         | GCGTTCTTTCATCTGTGTA CTCT    |
| <i>Cx3cr1</i> | Rn.PT.58.8221047  | CACGATGTCACCCAAATAACAG        | CTGGCACTTCCTGCAGAA          |
| <i>Eif2b1</i> | Rn.PT.58.13475352 | TCT CCA TGA TAT AGC CAA CAG C | GGA GTC ACA GCC TGA TTT ATC |

|               |                   |                               | TG                             |
|---------------|-------------------|-------------------------------|--------------------------------|
| <i>Ereg</i>   | Rn.PT.58.6893979  | AGT AGC CGT CCA TGT CAG A     | ACC GTG ATT CCG TCA TGT ATC    |
| <i>IL-1β</i>  | Rn.PT.58.38028824 | TTGTCGTTGCTTGTCTCTCC          | GTGCTGTCTGACCCATGT             |
| <i>IL-6</i>   | Rn.PT.58.13840513 | CCTTCTGTGACTCTAACTTCTCC       | CAGAGCAATACTGAAACCCTAGT        |
| <i>Lox</i>    | Rn.PT.58.30075412 | GAA ATC GTA GCA GTA CCCTGT    | GTC TAT GTA CAA CCT GAG ATG CG |
| <i>Mkx</i>    | Rn.PT.58.13871338 | CGTCTAGCATTAGCGAACCAA         | CTTTACAAGCACCGTGACAAC          |
| <i>Mmp1</i>   | Rn.PT.58.7424580  | TCA TGA GCC GTA ACA TAG AAC A | GAC TTG CTC ACA CAT TCC CA     |
| <i>Mmp3</i>   | Rn.PT.58.44652574 | CTGTGGAGGACTTGTAGACTG         | CTATTCTGGTTGCTGCTCAT           |
| <i>Mmp9</i>   | Rn.PT.58.7383134  | GGA GGT CAT AGG TCA CGT AGG   | GAA CTC ACA CAA CGT CTT TCA C  |
| <i>Polr2a</i> | Rn.PT.58.35295130 | GGC AGA TAC ACC AGC ATA GTG   | TCC AAG TTC AAC CAA GCC AT     |
| <i>Scx</i>    | Rn.PT.58.31750069 | CTCCTCCTTCTAACTTCGAATCG       | CACCCAGCCCAAACAGAT             |
| <i>Tnmd</i>   | Rn.PT.58.35753845 | CACCTGTCACCAAGCCATT           | GCAGAGTTCCATCTTTAGCCT          |
| <i>Tnfa</i>   | Rn.PT.58.11142874 | GTCTTTGAGATCCATGCCATTG        | AGACCCTCACACTCAGATCA           |
| <i>Ywhaz</i>  | Rn.PT.58.12339560 | CAG CAA CCT CAG CCA AGT AG    | GAC ATC TGC AAC GAC GTA CT     |

426

#### 427 *Western Blot*

428 Ten to 15 µg of total protein of the tendon-like constructs' lysate were separated on 10–12% SDS-  
 429 polyacrylamide gels in Laemmli buffer. Proteins were then transferred to a PVDF membrane (Biorad,  
 430 Munich, Germany) using 15.6 mM Tris base, 120 mM glycine, and 20% methanol for 1.5 h at 90 V and  
 431 4 °C. Membranes were blocked in 5% non-fat dry milk powder or 5% BSA hydrolysate in TBS with  
 432 0.5% Tween-20, respectively over night at 4°C. Immunodetection was performed using primary  
 433 antibodies recognizing epiregulin and CX3CL1 and secondary horseradish peroxidase  
 434 (HRP)-labelled goat anti-rabbit antibodies, respectively (BioRad, Munich, Germany). Bands  
 435 were visualized using the Clarity™ Western ECL substrate from BioRad (#170-5060). Band  
 436 intensities of at least 3 individual experiments were measured densitometrically and  
 437 normalized to whole protein using the Image Lab Software 5.1 from BioRad (Biorad, Munich,  
 438 Germany).

#### 439 *Migration assay*

440 In order to examine a potential role of fractalkine present in tendon cells on migratory  
 441 processes, we performed a migration assay using AZD 8797 (Axon Medchem, Groningen,  
 442 Netherlands), a selective, high-affinity small-molecule inhibitor of CX3CR1. To this end, we  
 443 seeded rat TDSPCs on both uncoated and collagen coated petri dish. Cells were grown to  
 444 confluence and serum starved at 1 % serum for 24 hours in order to arrest proliferation. The  
 445 cell monolayer was then scratched by a sterile 200 µm pipette tip and further cultivated in  
 446 presence and absence of the inhibitor. After 24 hours, images were taken with a microscope  
 447 and the distance between the wound margins was measured (Cory, 2011).

#### 448 *Statistical analysis*

449 All experiments were repeated at least three times. Statistical analyses were performed  
 450 using GraphPad Prism v.5.04 (La Jolla, CA, USA). Numerical data is presented as  
 451 means ± standard deviation. One way analysis of variance (ANOVA) for multiple comparisons

452 and 2-sample t-test for pair-wise comparisons were employed after confirming normal  
453 distribution of the data (D'Agostino and Pearson omnibus normality test). Non-parametric  
454 statistics were utilised when the above assumption was violated and consequently Kruskal–  
455 Wallis test for multiple comparisons or Mann–Whitney test to determine two-tailed p-value  
456 samples was carried out. Statistical significance was set at  $\alpha = 0.05$ .

457

#### 458 **Acknowledgements**

459 We would like to acknowledge Dr. Stella Autenrieth from the Medical Clinic of the University of  
460 Tübingen, Germany for providing the CX3CR1-GFP transgenic mouse strain and Prof. Thomas  
461 Langmann from the Eye Clinic of the University of Cologne for providing the MacGreen (Cfs1r-EGFP)  
462 transgenicmice.

463

#### 464 **Competing Interests:**

465 The authors declare no competing or financial interests.

466

#### 467 **Author contributions:**

468 CL, HT and AT designed the research. CL, GS, HT, AW and NW performed experiments. CD, KE and FW  
469 provided human biopsy samples. CL, HT, RG and AT drafted and/or wrote the manuscript. CL, HT and  
470 AT provided funding. CL, HT, and AT supervised the work.

471

#### 472 **Funding:**

473 The study was funded by grants from the Federal Ministry of Education, Science and Research  
474 (Sparkling Science, SPA 06/224) and from PMU-FFF (R-18/05/112-SPI).

475 **References:**

- 476 **Abraham, A. C., Shah, S. A., Golman, M., Song, L., Li, X., Kurtaliaj, I., Akbar, M., Millar, N. L.,**  
477 **Abu-Amer, Y., Galatz, L. M. et al. (2019).** Targeting the NF-kappaB signaling pathway in chronic  
478 tendon disease. *Sci Transl Med* **11**.
- 479 **Auffray, C., Fogg, D., Garfa, M., Elain, G., Join-Lambert, O., Kayal, S., Sarnacki, S., Cumano,**  
480 **A., Lauvau, G. and Geissmann, F. (2007).** Monitoring of blood vessels and tissues by a population of  
481 monocytes with patrolling behavior. *Science* **317**, 666-70.
- 482 **Bazan, J. F., Bacon, K. B., Hardiman, G., Wang, W., Soo, K., Rossi, D., Greaves, D. R., Zlotnik,**  
483 **A. and Schall, T. J. (1997).** A new class of membrane-bound chemokine with a CX3C motif. *Nature*  
484 **385**, 640-4.
- 485 **Cao, Y., Wang, L., Yang, H., Lin, X., Li, G., Han, N., Du, J. and Fan, Z. (2018).** Epiregulin  
486 promotes the migration and chemotaxis ability of adipose-derived mesenchymal stem cells via  
487 mitogen-activated protein kinase signaling pathways. *J Cell Biochem* **119**, 8450-8459.
- 488 **Carlin, L. M., Stamatiades, E. G., Auffray, C., Hanna, R. N., Glover, L., Vizcay-Barrena, G.,**  
489 **Hedrick, C. C., Cook, H. T., Diebold, S. and Geissmann, F. (2013).** Nr4a1-dependent Ly6C(low)  
490 monocytes monitor endothelial cells and orchestrate their disposal. *Cell* **153**, 362-75.
- 491 **Clark, A. K., Staniland, A. A. and Malcangio, M. (2011).** Fractalkine/CX3CR1 signalling in  
492 chronic pain and inflammation. *Curr Pharm Biotechnol* **12**, 1707-14.
- 493 **Cory, G. (2011).** Scratch-wound assay. *Methods Mol Biol* **769**, 25-30.
- 494 **Davies, L. C. and Taylor, P. R. (2015).** Tissue-resident macrophages: then and now.  
495 *Immunology* **144**, 541-8.
- 496 **Dean, B. J., Gettings, P., Dakin, S. G. and Carr, A. J. (2016).** Are inflammatory cells increased  
497 in painful human tendinopathy? A systematic review. *Br J Sports Med* **50**, 216-20.
- 498 **Dean, B. J. F., Dakin, S. G., Millar, N. L. and Carr, A. J. (2017).** Review: Emerging concepts in  
499 the pathogenesis of tendinopathy. *Surgeon* **15**, 349-354.
- 500 **Deckers, J., Hammad, H. and Hoste, E. (2018).** Langerhans Cells: Sensing the Environment in  
501 Health and Disease. *Front Immunol* **9**, 93.
- 502 **Fonovic, U. P., Jevnikar, Z. and Kos, J. (2013).** Cathepsin S generates soluble CX3CL1  
503 (fractalkine) in vascular smooth muscle cells. *Biol Chem* **394**, 1349-52.
- 504 **Garcia, G. E., Xia, Y., Chen, S., Wang, Y., Ye, R. D., Harrison, J. K., Bacon, K. B., Zerwes, H. G.**  
505 **and Feng, L. (2000).** NF-kappaB-dependent fractalkine induction in rat aortic endothelial cells  
506 stimulated by IL-1beta, TNF-alpha, and LPS. *J Leukoc Biol* **67**, 577-84.
- 507 **Gehwolf, R., Spitzer, G., Wagner, A., Lehner, C., Weissenbacher, N., Tempfer, H. and**  
508 **Traweger, A. (2019).** 3D-Embedded Cell Cultures to Study Tendon Biology. *Methods Mol Biol*.
- 509 **Geissmann, F., Jung, S. and Littman, D. R. (2003).** Blood monocytes consist of two principal  
510 subsets with distinct migratory properties. *Immunity* **19**, 71-82.
- 511 **Harada, M., Kamimura, D., Arima, Y., Kohsaka, H., Nakatsuji, Y., Nishida, M., Atsumi, T.,**  
512 **Meng, J., Bando, H., Singh, R. et al. (2015).** Temporal expression of growth factors triggered by  
513 epiregulin regulates inflammation development. *J Immunol* **194**, 1039-46.
- 514 **Hume, D. A., Perry, V. H. and Gordon, S. (1984).** The mononuclear phagocyte system of the  
515 mouse defined by immunohistochemical localisation of antigen F4/80: macrophages associated with  
516 epithelia. *Anat Rec* **210**, 503-12.
- 517 **Imai, T., Hieshima, K., Haskell, C., Baba, M., Nagira, M., Nishimura, M., Kakizaki, M., Takagi,**  
518 **S., Nomiyama, H., Schall, T. J. et al. (1997).** Identification and molecular characterization of  
519 fractalkine receptor CX3CR1, which mediates both leukocyte migration and adhesion. *Cell* **91**, 521-30.
- 520 **Isozaki, T., Otsuka, K., Sato, M., Takahashi, R., Wakabayashi, K., Yajima, N., Miwa, Y. and**  
521 **Kasama, T. (2011).** Synergistic induction of CX3CL1 by interleukin-1beta and interferon-gamma in  
522 human lung fibroblasts: involvement of signal transducer and activator of transcription 1 signaling  
523 pathways. *Transl Res* **157**, 64-70.
- 524 **Jung, S., Aliberti, J., Graemmel, P., Sunshine, M. J., Kreutzberg, G. W., Sher, A. and Littman,**  
525 **D. R. (2000).** Analysis of fractalkine receptor CX(3)CR1 function by targeted deletion and green  
526 fluorescent protein reporter gene insertion. *Mol Cell Biol* **20**, 4106-14.

- 527 **Kanazawa, N., Nakamura, T., Tashiro, K., Muramatsu, M., Morita, K., Yoneda, K., Inaba, K.,**  
528 **Imamura, S. and Honjo, T.** (1999). Fractalkine and macrophage-derived chemokine: T cell-attracting  
529 chemokines expressed in T cell area dendritic cells. *Eur J Immunol* **29**, 1925-32.
- 530 **Khan, K. M., Cook, J. L., Kannus, P., Maffulli, N. and Bonar, S. F.** (2002). Time to abandon the  
531 "tendinitis" myth. *BMJ* **324**, 626-7.
- 532 **Khan, K. M., Cook, J. L., Taunton, J. E. and Bonar, F.** (2000). Overuse tendinosis, not  
533 tendinitis part 1: a new paradigm for a difficult clinical problem. *Phys Sportsmed* **28**, 38-48.
- 534 **Klosowska, K., Volin, M. V., Huynh, N., Chong, K. K., Halloran, M. M. and Woods, J. M.**  
535 (2009). Fractalkine functions as a chemoattractant for osteoarthritis synovial fibroblasts and  
536 stimulates phosphorylation of mitogen-activated protein kinases and Akt. *Clin Exp Immunol* **156**, 312-  
537 9.
- 538 **Kragsnaes, M. S., Fredberg, U., Stribolt, K., Kjaer, S. G., Bendix, K. and Ellingsen, T.** (2014).  
539 Stereological quantification of immune-competent cells in baseline biopsy specimens from achilles  
540 tendons: results from patients with chronic tendinopathy followed for more than 4 years. *Am J Sports*  
541 *Med* **42**, 2435-45.
- 542 **Kristiansen, M., Graversen, J. H., Jacobsen, C., Sonne, O., Hoffman, H. J., Law, S. K. and**  
543 **Moestrup, S. K.** (2001). Identification of the haemoglobin scavenger receptor. *Nature* **409**, 198-201.
- 544 **Lee, M., Lee, Y., Song, J., Lee, J. and Chang, S. Y.** (2018). Tissue-specific Role of CX3CR1  
545 Expressing Immune Cells and Their Relationships with Human Disease. *Immune Netw* **18**, e5.
- 546 **Lehner, C., Gehwolf, R., Ek, J. C., Korntner, S., Bauer, H., Bauer, H. C., Traweger, A. and**  
547 **Tempfer, H.** (2016). The blood-tendon barrier: identification and characterisation of a novel tissue  
548 barrier in tendon blood vessels. *Eur Cell Mater* **31**, 296-311.
- 549 **Li, D., Chen, H., Luo, X. H., Sun, Y., Xia, W. and Xiong, Y. C.** (2016). CX3CR1-Mediated Akt1  
550 Activation Contributes to the Paclitaxel-Induced Painful Peripheral Neuropathy in Rats. *Neurochem*  
551 *Res* **41**, 1305-14.
- 552 **Lundgreen, K., Lian, O. B., Engebretsen, L. and Scott, A.** (2011). Tenocyte apoptosis in the  
553 torn rotator cuff: a primary or secondary pathological event? *Br J Sports Med* **45**, 1035-9.
- 554 **Martin, L. J., Smith, S. B., Khoutorsky, A., Magnussen, C. A., Samoshkin, A., Sorge, R. E.,**  
555 **Cho, C., Yosefpour, N., Sivaselvachandran, S., Tohyama, S. et al.** (2017). Epiregulin and EGFR  
556 interactions are involved in pain processing. *J Clin Invest* **127**, 3353-3366.
- 557 **Mass, E., Ballesteros, I., Farlik, M., Halbritter, F., Gunther, P., Crozet, L., Jacome-Galarza, C.**  
558 **E., Handler, K., Klughammer, J., Kobayashi, Y. et al.** (2016). Specification of tissue-resident  
559 macrophages during organogenesis. *Science* **353**.
- 560 **Massip-Copiz, M., Clauzure, M., Valdivieso, A. G. and Santa-Coloma, T. A.** (2018). Epiregulin  
561 (EREG) is upregulated through an IL-1beta autocrine loop in Caco-2 epithelial cells with reduced CFTR  
562 function. *J Cell Biochem* **119**, 2911-2922.
- 563 **Millar, N. L., Hueber, A. J., Reilly, J. H., Xu, Y., Fazzi, U. G., Murrell, G. A. and McInnes, I. B.**  
564 (2010). Inflammation is present in early human tendinopathy. *Am J Sports Med* **38**, 2085-91.
- 565 **Murakami, M., Harada, M., Kamimura, D., Ogura, H., Okuyama, Y., Kumai, N., Okuyama, A.,**  
566 **Singh, R., Jiang, J. J., Atsumi, T. et al.** (2013). Disease-association analysis of an inflammation-related  
567 feedback loop. *Cell Rep* **3**, 946-59.
- 568 **Nakayama, T., Watanabe, Y., Oiso, N., Higuchi, T., Shigeta, A., Mizuguchi, N., Katou, F.,**  
569 **Hashimoto, K., Kawada, A. and Yoshie, O.** (2010). Eotaxin-3/CC chemokine ligand 26 is a functional  
570 ligand for CX3CR1. *J Immunol* **185**, 6472-9.
- 571 **Papadopoulos, E. J., Fitzhugh, D. J., Tkaczyk, C., Gilfillan, A. M., Sasseti, C., Metcalfe, D. D.**  
572 **and Hwang, S. T.** (2000). Mast cells migrate, but do not degranulate, in response to fractalkine, a  
573 membrane-bound chemokine expressed constitutively in diverse cells of the skin. *Eur J Immunol* **30**,  
574 2355-61.
- 575 **Pryce, B. A., Brent, A. E., Murchison, N. D., Tabin, C. J. and Schweitzer, R.** (2007). Generation  
576 of transgenic tendon reporters, ScxGFP and ScxAP, using regulatory elements of the scleraxis gene.  
577 *Developmental dynamics: an official publication of the American Association of Anatomists* **236**,  
578 1677-82.



- 579 **Riese, D. J., 2nd and Cullum, R. L.** (2014). Epiregulin: roles in normal physiology and cancer.  
580 *Semin Cell Dev Biol* **28**, 49-56.
- 581 **Sasmono, R. T., Oceandy, D., Pollard, J. W., Tong, W., Pavli, P., Wainwright, B. J., Ostrowski,**  
582 **M. C., Himes, S. R. and Hume, D. A.** (2003). A macrophage colony-stimulating factor receptor-green  
583 fluorescent protein transgene is expressed throughout the mononuclear phagocyte system of the  
584 mouse. *Blood* **101**, 1155-63.
- 585 **Sasmono, R. T. and Williams, E.** (2012). Generation and characterization of MacGreen mice,  
586 the Cfs1r-EGFP transgenic mice. *Methods Mol Biol* **844**, 157-76.
- 587 **Schneider, M., Angele, P., Jarvinen, T. A. H. and Docheva, D.** (2018). Rescue plan for Achilles:  
588 Therapeutics steering the fate and functions of stem cells in tendon wound healing. *Advanced drug*  
589 *delivery reviews* **129**, 352-375.
- 590 **Sheridan, G. K. and Murphy, K. J.** (2013). Neuron-glia crosstalk in health and disease:  
591 fractalkine and CX3CR1 take centre stage. *Open Biol* **3**, 130181.
- 592 **Sokolowski, J. D., Chabanon-Hicks, C. N., Han, C. Z., Heffron, D. S. and Mandell, J. W.** (2014).  
593 Fractalkine is a "find-me" signal released by neurons undergoing ethanol-induced apoptosis. *Front*  
594 *Cell Neurosci* **8**, 360.
- 595 **Truman, L. A., Ford, C. A., Pasikowska, M., Pound, J. D., Wilkinson, S. J., Dumitriu, I. E.,**  
596 **Melville, L., Melrose, L. A., Ogden, C. A., Nibbs, R. et al.** (2008). CX3CL1/fractalkine is released from  
597 apoptotic lymphocytes to stimulate macrophage chemotaxis. *Blood* **112**, 5026-36.
- 598 **Tsai, W. H., Shih, C. H., Feng, S. Y., Li, I. T., Chang, S. C., Lin, Y. C. and Hsu, H. C.** (2014).  
599 CX3CL1(+) microparticles mediate the chemoattraction of alveolar macrophages toward apoptotic  
600 acute promyelocytic leukemic cells. *Cell Physiol Biochem* **33**, 594-604.
- 601 **Umehara, H., Bloom, E. T., Okazaki, T., Nagano, Y., Yoshie, O. and Imai, T.** (2004).  
602 Fractalkine in vascular biology: from basic research to clinical disease. *Arterioscler Thromb Vasc Biol*  
603 **24**, 34-40.
- 604 **Vandesompele, J., De Preter, K., Pattyn, F., Poppe, B., Van Roy, N., De Paepe, A. and**  
605 **Speleman, F.** (2002). Accurate normalization of real-time quantitative RT-PCR data by geometric  
606 averaging of multiple internal control genes. *Genome Biol* **3**, Research0034.
- 607 **White, G. E., Tan, T. C., John, A. E., Whatling, C., McPheat, W. L. and Greaves, D. R.** (2010).  
608 Fractalkine has anti-apoptotic and proliferative effects on human vascular smooth muscle cells via  
609 epidermal growth factor receptor signalling. *Cardiovasc Res* **85**, 825-35.
- 610 **Wu, X. M., Liu, Y., Qian, Z. M., Luo, Q. Q. and Ke, Y.** (2016). CX3CL1/CX3CR1 Axis Plays a Key  
611 Role in Ischemia-Induced Oligodendrocyte Injury via p38MAPK Signaling Pathway. *Mol Neurobiol* **53**,  
612 4010-4018.
- 613 **Yang, J., Zhang, L., Yu, C., Yang, X. F. and Wang, H.** (2014). Monocyte and macrophage  
614 differentiation: circulation inflammatory monocyte as biomarker for inflammatory diseases. *Biomark*  
615 *Res* **2**, 1.
- 616 **You, J. J., Yang, C. H., Huang, J. S., Chen, M. S. and Yang, C. M.** (2007). Fractalkine, a CX3C  
617 chemokine, as a mediator of ocular angiogenesis. *Invest Ophthalmol Vis Sci* **48**, 5290-8.
- 618 **Zhuang, S., Yan, Y., Daubert, R. A. and Schnellmann, R. G.** (2007). Epiregulin promotes  
619 proliferation and migration of renal proximal tubular cells. *Am J Physiol Renal Physiol* **293**, F219-26.

620

621

622

623 **Figure Legends:**

624 **Fig. 1:** Immunohistochemical staining of immune cell markers on histological sections of Achilles  
625 tendons from *Scleraxis (SCX)-GFP* transgenic mice reveals that SCX-positive cells co-express CD68,  
626 MHCII, CD163, and F4/80, respectively (A, B; arrows). Cryo-sections of Achilles tendon from  
627 transgenic *Csf-1r* and *Cx3cr1-GFP* reporter mice show that cells within the dense part of the tendon  
628 are positive for CSF-1R and CX3CR1 (arrows).

629

630 **Fig. 2:** Cryosections of Achilles tendons from transgenic *Cx3cr1-GFP* (A, C) and *Scx-GFP* (B, D) reporter  
631 mice immunohistochemically stained with antibodies recognizing CX3CL1/FKN, its receptor CX3CR1,  
632 and EREG respectively. Arrows point towards cells co-expressing the respective proteins.

633

634 **Fig. 3:** In situ phagocytosis assay on unfixed rat flexor tendons shows that tendon cells lying within  
635 the dense collagen matrix (shown by extracellular matrix (ECM) autofluorescence / blue channel)  
636 exert phagocytic activity (green fluorescence). Two representative regions are shown.

637

638 **Fig. 4:** 3D tendon-like constructs were stimulated with either IL-1 $\beta$ , TNF- $\alpha$ , or a combination of both  
639 cytokines (A). Effects on the expression levels of genes encoding for inflammatory proteins (*IL-1 $\beta$* ,  
640 *TNF $\alpha$* , *IL-6*), extracellular matrix-related proteins (e.g. *Col1a1*, *Col3a1*, *Lox*, *Mmp-1*, *Mmp-3*, *Mmp-9*),  
641 and tendon cell-related marker proteins (*Mwk*, *Scx*, *Tnmd*) were assessed by qPCR. Significant  
642 changes were detected for *IL-1 $\beta$* , *IL-6*, *Lox*, *Mmp-1*, *Mmp-3*, and *Mmp-9*. Bars represent mean  $\pm$  SEM  
643 (for 5 individual animals); \* $p < 0.05$ , \*\* $p < 0.01$ , Mann Whitney test. Dashed green line: control  
644 reference.

645

646 **Fig. 5:** Effects of pro-inflammatory stimulation of tendon-like constructs on mRNA (A), and protein  
647 level (B, C). IL-1 $\beta$  or TNF- $\alpha$  or a combination of both cytokines resulted in a significant upregulation of  
648 *CD68*, *Cx3cl1*, and *Ereg* mRNA expression (A). Immunohistochemical stainings confirmed the qPCR  
649 findings. *Cx3cr1* remained unaffected by the treatment (B). Furthermore, Western blot analysis  
650 revealed a synergistic effect of IL-1 $\beta$  and TNF- $\alpha$  on *Cx3cl1* and *Ereg* expression (C). \* $p < 0.05$ ,  
651 \*\* $p < 0.01$ , Mann-Whitney test.

652

653 **Fig. 6:** Rat tendon-derived cells (passage 1) express *Cx3cl1* and *Cx3cr1* (A). Addition of AZD 8797  
654 attenuates IL-1 $\beta$  triggered upregulation of both IL-1 $\beta$  and IL-6 (B, C). Representative images (D)  
655 showing wound scratch assays on uncoated and collagen-coated culture plates. Quantitative analysis  
656 revealed that the FKN inhibitor AZD 8797 significantly reduces migration (E). \* $p < 0.05$ , \*\* $p < 0.01$ ,  
657 Kruskal Wallis and Dunn's Multiple Comparison test.

658

659

660

661 **Fig. 7:** Cryo-sections of intact human semitendinosus tendon (♂, 34 years). Alcian Blue and  
662 Hematoxylin-Eosin (HE) stainings show the parallel alignment of collagen fibers and elongated cell  
663 nuclei characteristic for intact tendons (A). Immunofluorescent images demonstrating the presence  
664 of cells expressing CX3CL1/FKN (B), its cognate receptor CX3CR1 (C), and epiregulin (EREG) (D) in the  
665 tendon proper.

666

#### 667 **Supplement 1**

##### 668 **Suppl. Fig. 1:**

669 Longitudinal cryo-sections of Achilles tendons from *Cx3cr1-GFP* transgenic mice co-stained with an  
670 antibody directed against the Cx3cr1 protein shows a high degree of overlap (merge), confirming the  
671 expression pattern of the Cx3cr1-GFP protein.

672

##### 673 **Suppl. Fig. 2:**

674 Doublelabelling of longitudinal cryo-sections of Achilles tendons from *Cx3cr1-GFP* transgenic mice  
675 with antibodies directed against the macrophage-related markers CD68 and CD163 revealed co-  
676 expression of these markers with the Fkn receptor (see arrows).

677

##### 678 **Suppl. Fig. 3:**

679 Cross sections of an intact human semitendinosus tendon (♂, 22 years) demonstrating the  
680 expression of CX3CL1 and epiregulin in the perivascular region (see white arrows) and the tendon  
681 proper (yellow arrows).

682

683

**Fig. 1**

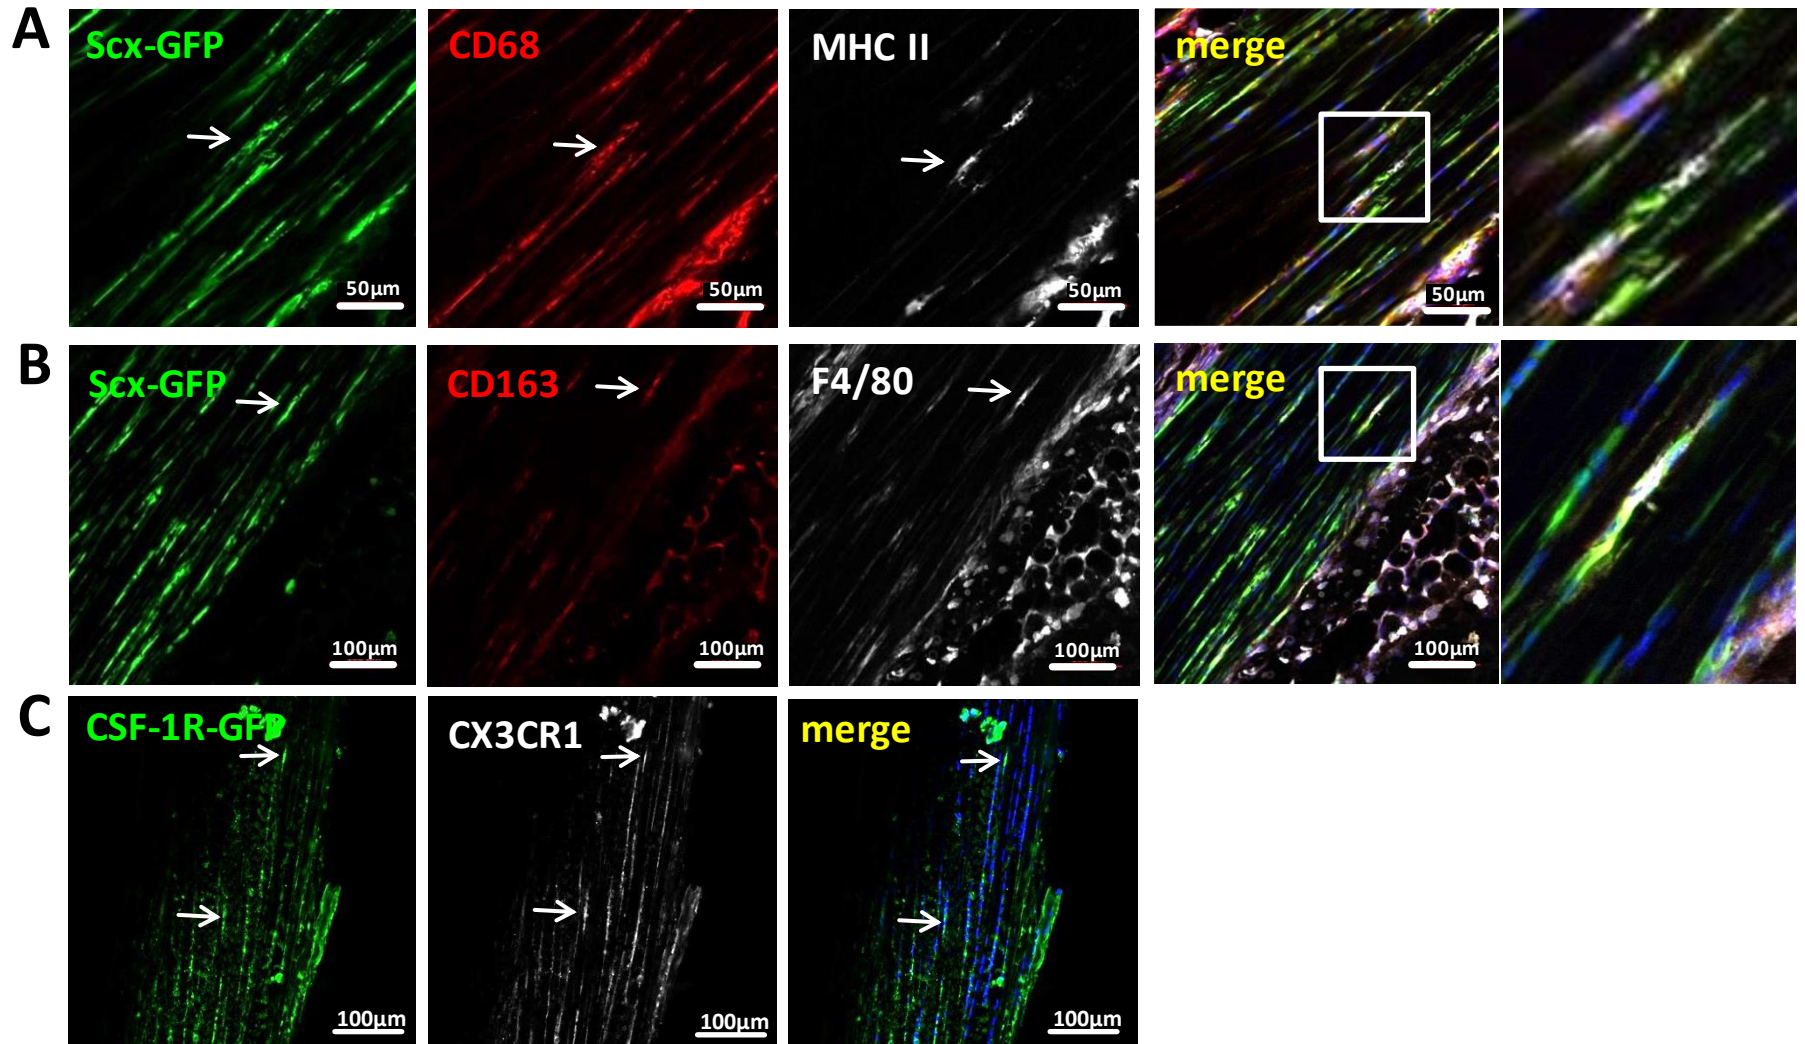

**Fig. 1:** Immunohistochemical staining of immune cell markers on histological sections of Achilles tendons from *Scleraxis* (*SCX*)-*GFP* transgenic mice reveals that SCX-positive cells co-express CD68, MHCII, CD163, and F4/80, respectively (A, B; arrows). Cryo-sections of Achilles tendon from transgenic *Csf-1r* and *Cx3cr1-GFP* reporter mice show that cells within the dense part of the tendon are positive for CSF-1R and CX3CR1 (arrows).

**Fig. 2**

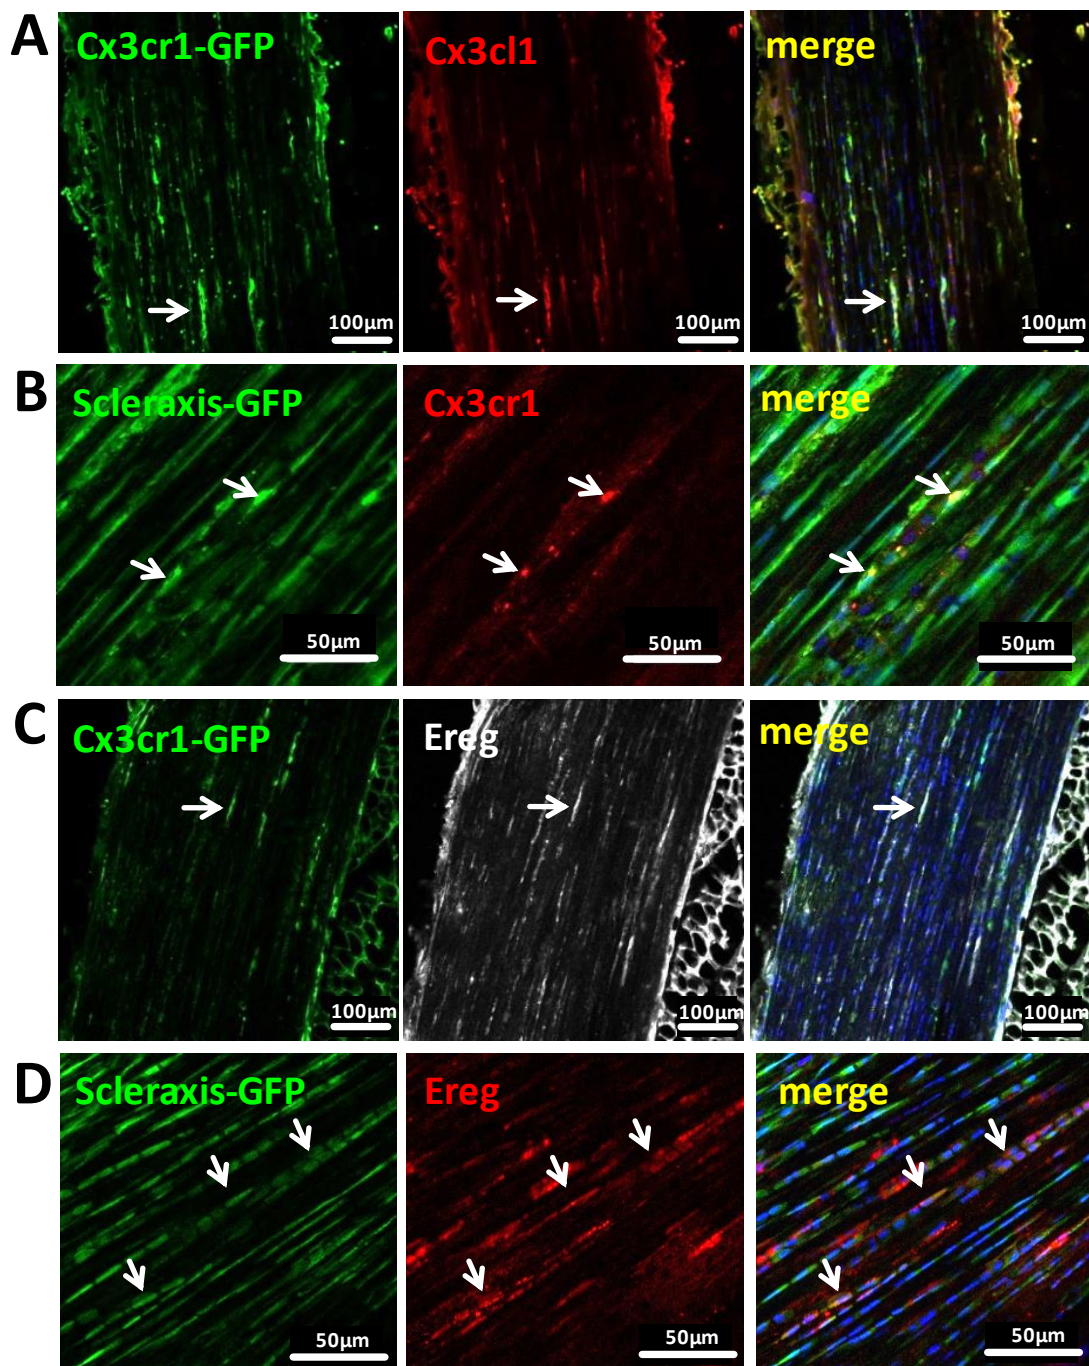

**Fig. 2:** Cryosections of Achilles tendons from transgenic *Cx3cr1-GFP* (A, C) and *Scx-GFP* (B, D) reporter mice immunohistochemically stained with antibodies recognizing CX3CL1/FKN, its receptor CX3CR1, and EREG respectively. Arrows point towards cells co-expressing the respective proteins.

**Fig. 3**

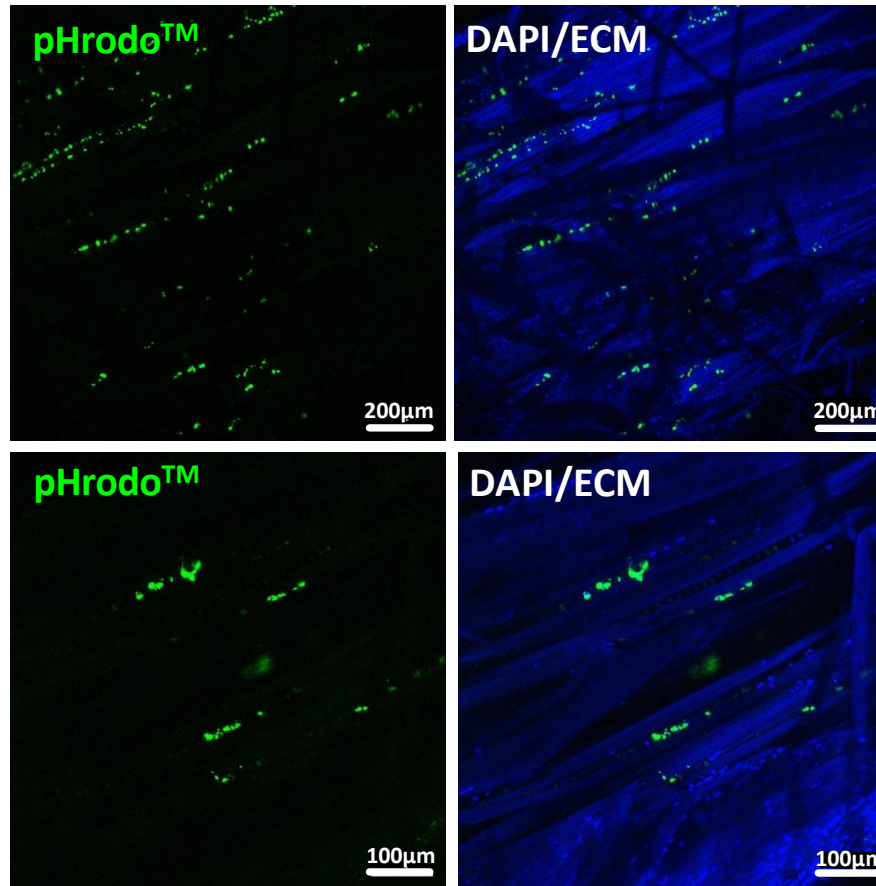

**Fig. 3:** In situ phagocytosis assay on unfixed rat flexor tendons shows that tendon cells lying within the dense collagen matrix (shown by extracellular matrix (ECM) autofluorescence / blue channel) exert phagocytic activity (green fluorescence). Two representative regions are shown.

Fig. 4

A

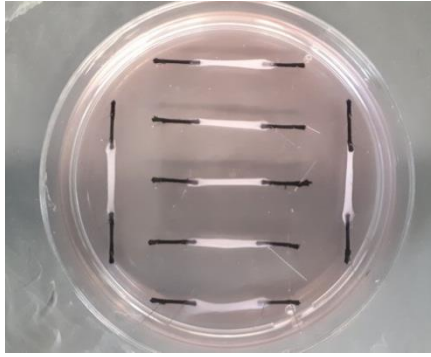

B

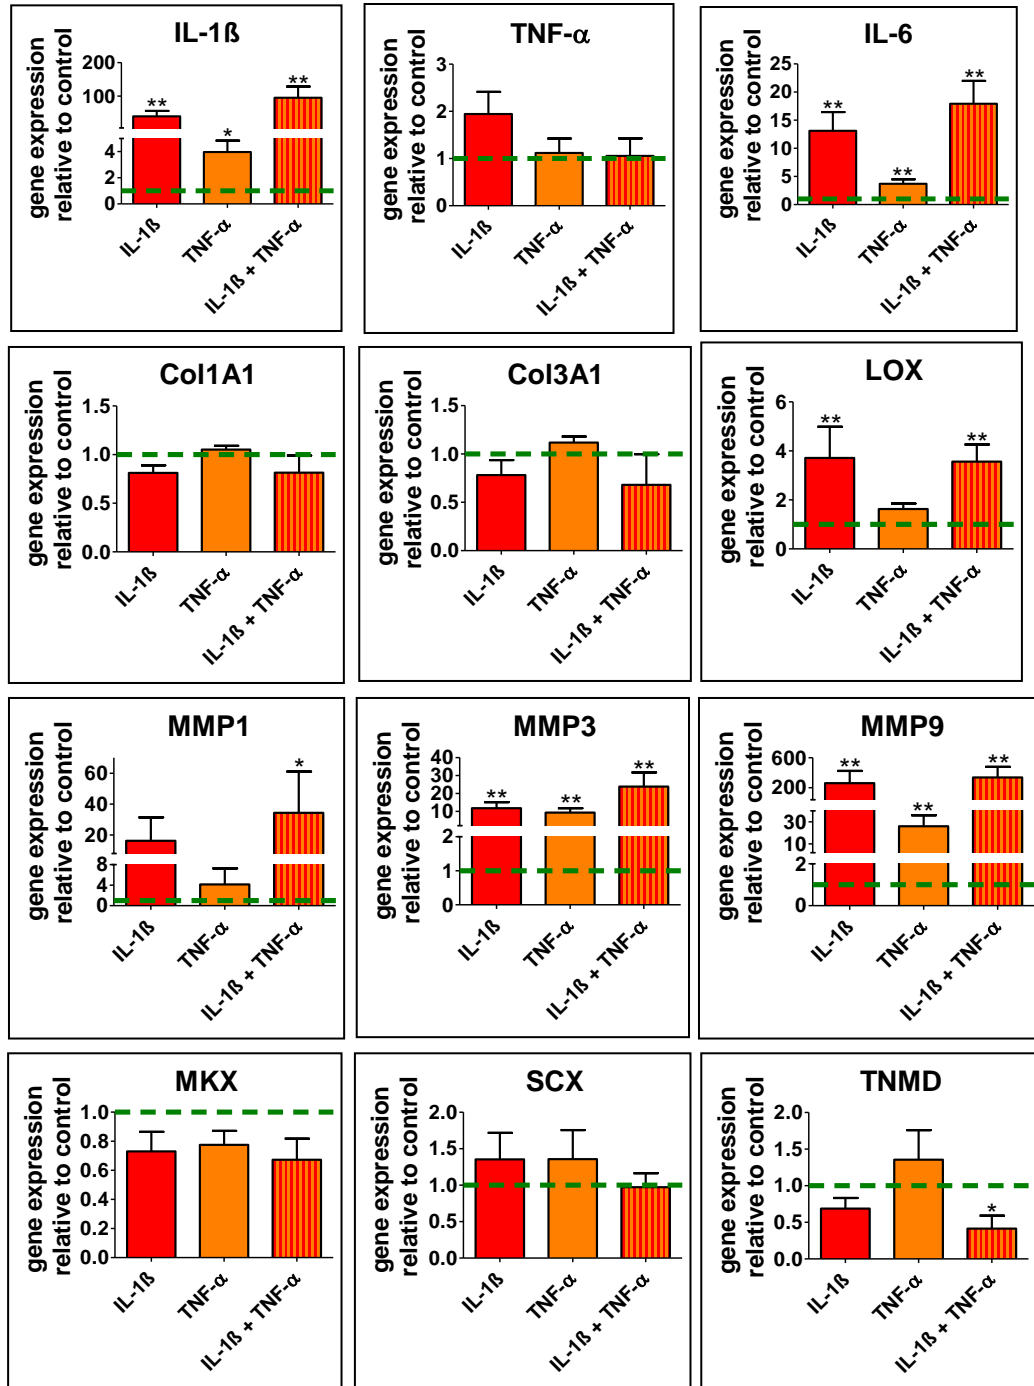

**Fig. 4:** 3D tendon-like constructs were stimulated with either IL-1 $\beta$ , TNF- $\alpha$ , or a combination of both cytokines (A). Effects on the expression levels of genes encoding for inflammatory proteins (*IL-1 $\beta$* , *TNF $\alpha$* , *IL-6*), extracellular matrix-related proteins (e.g. *Col1a1*, *Col3a1*, *Lox*, *Mmp-1*, *Mmp-3*, *Mmp-9*), and tendon cell-related marker proteins (*Mwk*, *Scx*, *Tnmd*) were assessed by qPCR. Significant changes were detected for *IL-1 $\beta$* , *IL-6*, *Lox*, *Mmp-1*, *Mmp-3*, and *Mmp-9*. Bars represent mean  $\pm$  SEM (for 5 individual animals); \* $p < 0.05$ , \*\* $p < 0.01$ , Mann Whitney test. Dashed green line: control reference.



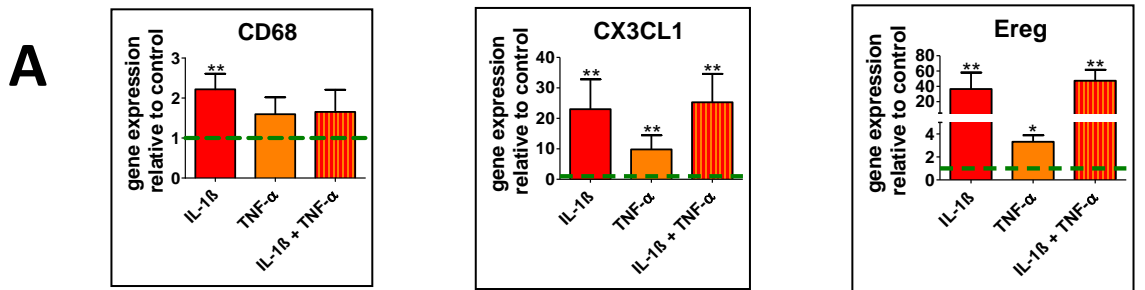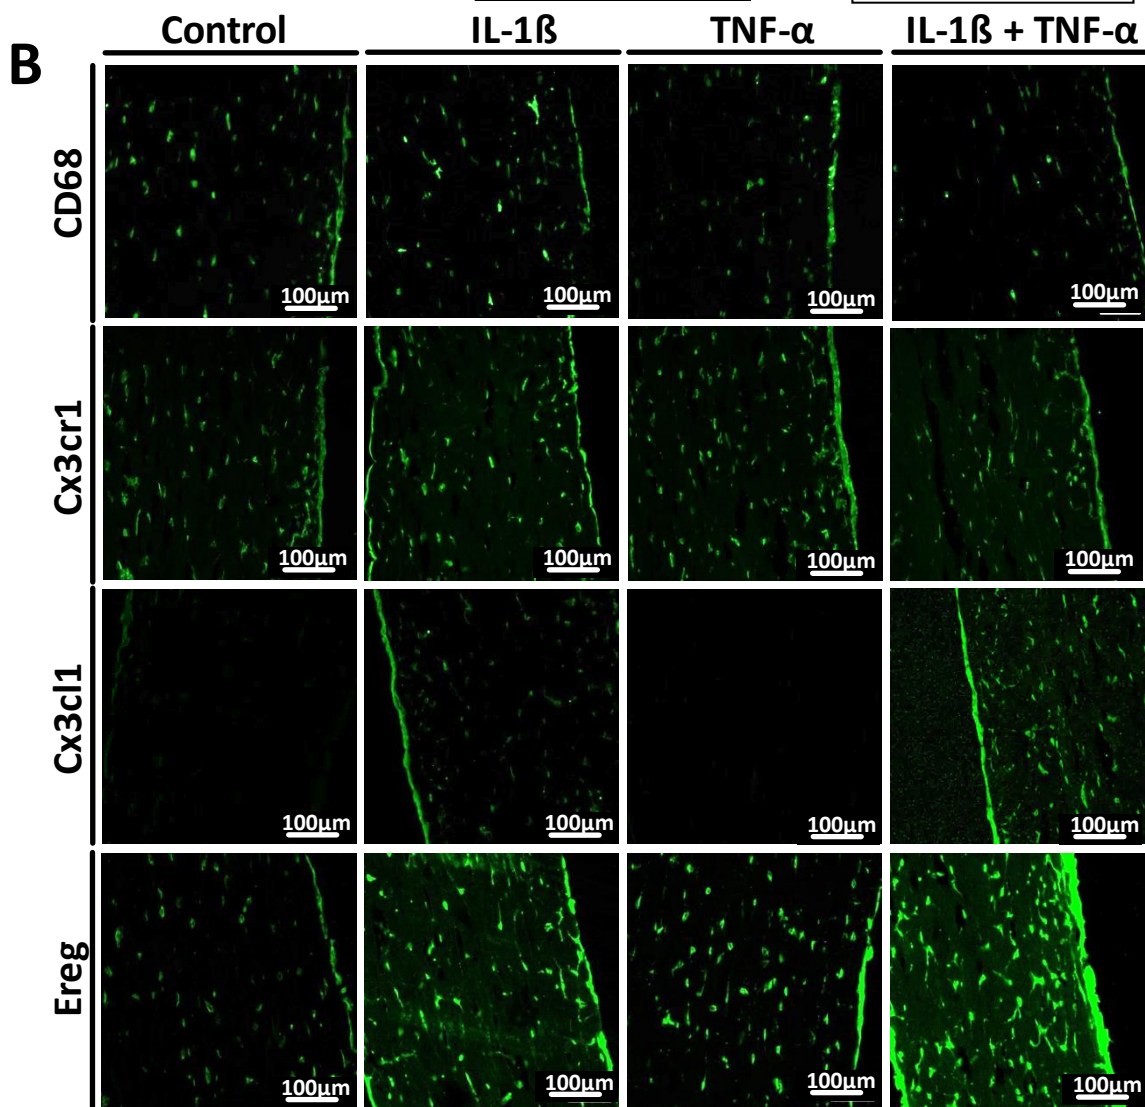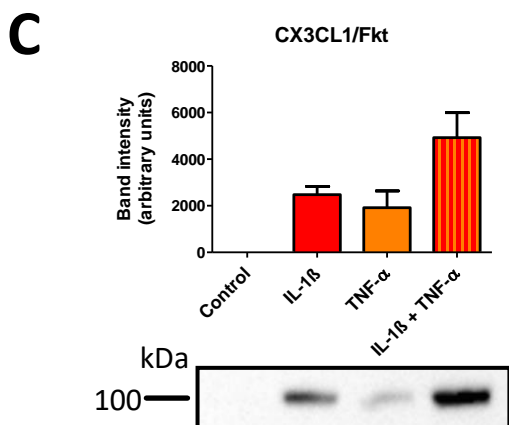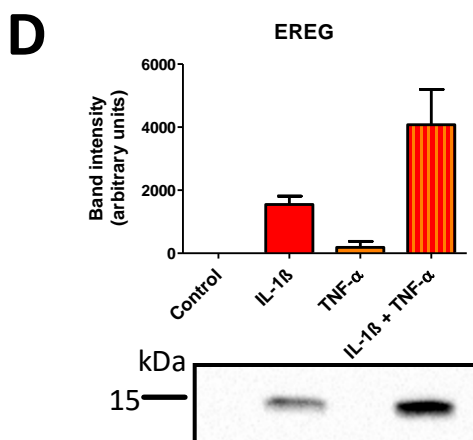

**Fig. 5**

**Fig. 5:** Effects of pro-inflammatory stimulation of tendon-like constructs on mRNA (A), and protein level (B, C). IL-1 $\beta$  or TNF- $\alpha$  or a combination of both cytokines resulted in a significant upregulation of *CD68*, *Cx3cl1*, and *Ereg* mRNA expression (A). Immunohistochemical stainings confirmed the qPCR findings. *Cx3cr1* remained unaffected by the treatment (B). Furthermore, Western blot analysis revealed a synergistic effect of IL-1 $\beta$  and TNF- $\alpha$  on *Cx3cl1* and *Ereg* expression (C). \* $p < 0.05$ , \*\* $p < 0.01$ , Mann-Whitney test.

Fig. 6

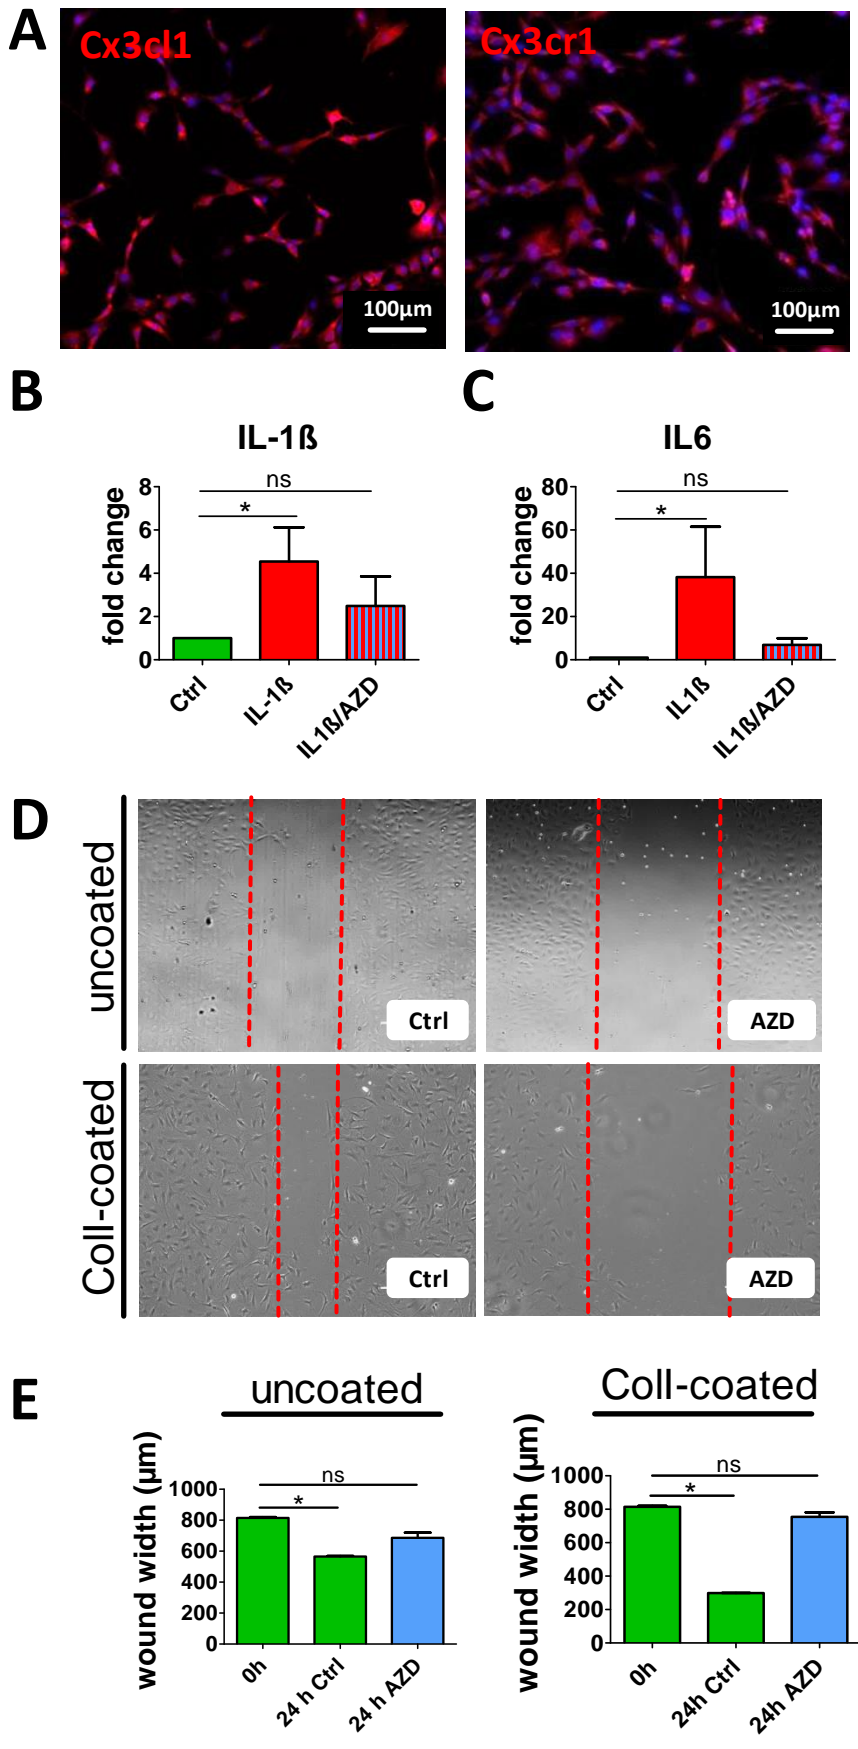

**Fig. 6:** Rat tendon-derived cells (passage 1) express Cx3cl1 and Cx3cr1 (A). Addition of AZD 8797 attenuates IL-1 $\beta$  triggered upregulation of both IL-1 $\beta$  and IL-6 (B, C). Representative images (D) showing wound scratch assays on uncoated and collagen-coated culture plates. Quantitative analysis revealed that the FKN inhibitor AZD 8797 significantly reduces migration (E). \* $p < 0.05$ , \*\* $p < 0.01$ , Kruskal Wallis and Dunn's Multiple Comparison test.

**Fig. 7**

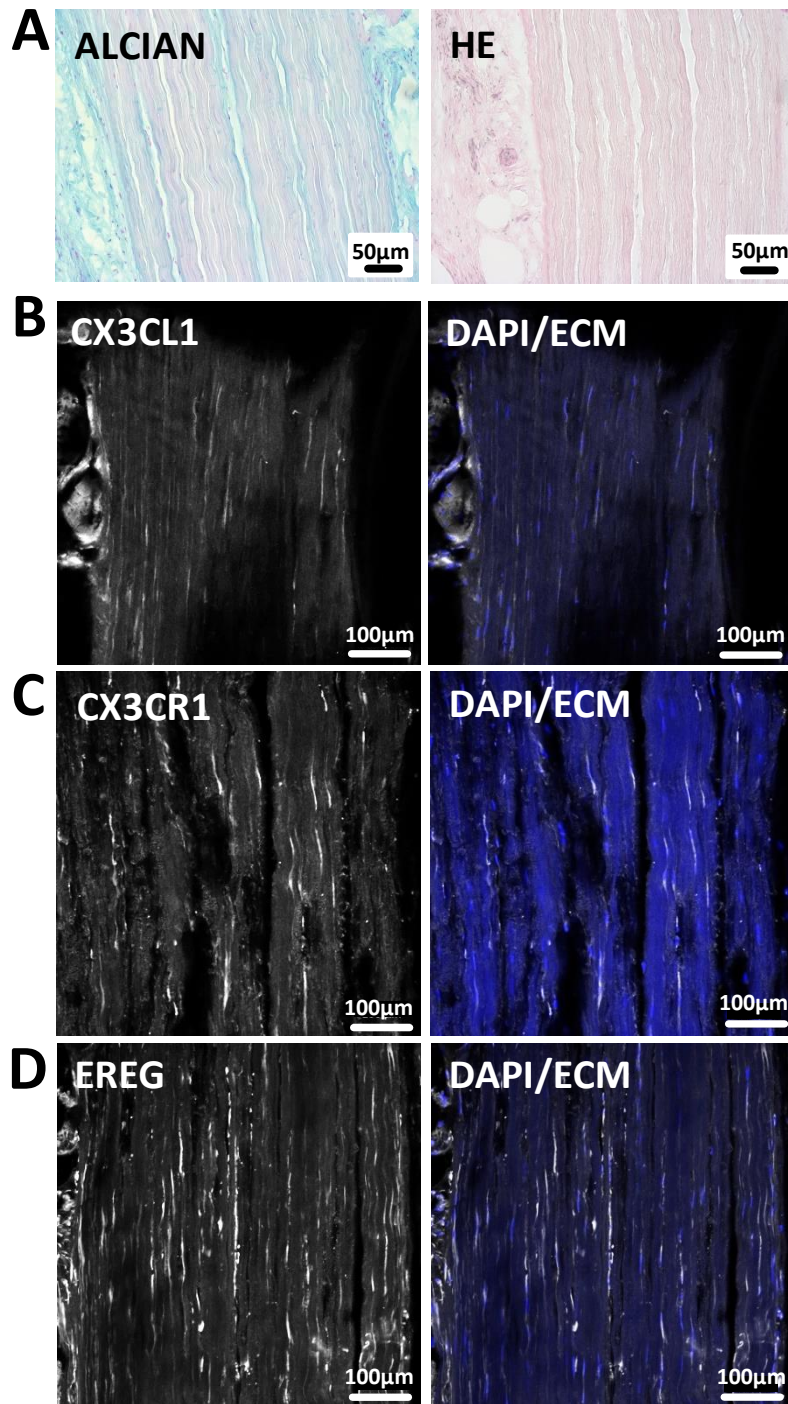

**Fig. 7:** Cryo-sections of intact human semitendinosus tendon (♂, 34 years). Alcian Blue and Hematoxylin-Eosin (HE) stainings show the parallel alignment of collagen fibers and elongated cell nuclei characteristic for intact tendons (A). Immunofluorescent images demonstrating the presence of cells expressing CX3CL1/FKN (B), its cognate receptor CX3CR1 (C), and epiregulin (EREG) (D) in the tendon proper.
